# Supplementary material for: Catalyst free novel synthesis of graphene and its application in high current OFET and phototransistor based on P3HT/G composite
Source: Royal Society of Chemistry journal article supplement (doi:10.1039/c3ra42243g), 2013-01-01
Supplement: c3ra42243g.pdf [file c3ra42243g.pdf]

## Supporting Information (SI-I)

**Table 1 Raman Spectroscopy Reference Data**

| No. | Reference (data for single layer graphene with green laser (514, 538 nm) excitation for Raman spectroscopy)                                                                          | Position of G peak (cm <sup>-1</sup> ) | Position of 2D peak (cm <sup>-1</sup> ) | FWHM of 2D peak (cm <sup>-1</sup> ) |
|-----|--------------------------------------------------------------------------------------------------------------------------------------------------------------------------------------|----------------------------------------|-----------------------------------------|-------------------------------------|
| 1.  | Raman Spectrum of Graphene and Graphene Layers by Geim <i>et. al. Phys. Rev. Lett.</i> <b>2006</b> , 97, 187401                                                                      | ~1580                                  | ~2700                                   | ~25                                 |
| 2.  | G' band Raman spectra of single, double and triple layer graphene by Dresselhaus <i>et. al. Carbon</i> , <b>2009</b> , 47, 1303                                                      | -                                      | ~2700                                   | 18-28                               |
| 3.  | Spatially Resolved Raman Spectroscopy of Single- and Few-Layer Graphene D. Graf <i>et. al. Nano Lett.</i> , <b>2007</b> , 7, 238                                                     | ~1582                                  | ~2700                                   | 30                                  |
| 4.  | Raman fingerprint of charged impurities in graphene A. C. Ferrari <i>et. al. Appl. Phys. Lett.</i> , 2007, 91, 233108                                                                | 1560-1580                              | ~2700                                   | 28-30                               |
| 5.  | Temperature Dependence of the Raman Spectra of Graphene and Graphene Multilayers by A. A. Balandin <i>et. al. Nano Lett.</i> , <b>2007</b> , 7, 2645                                 | ~1582                                  | 2691 (488 nm laser)                     | -                                   |
| 6.  | Freestanding Graphene by Thermal Splitting of Silicon Carbide Granules by X. Bao <i>et. al. Adv. Mater.</i> <b>2010</b> , 22, 2168                                                   | ~1585                                  | ~2700                                   | -                                   |
| 7.  | Raman spectroscopy of graphene and graphite: Disorder, electron–phonon coupling, doping and nonadiabatic effects by A. C. Ferrari <i>Solid State Commun.</i> , 2007, <b>143</b> , 47 | ~1580                                  | ~2700                                   | ~25                                 |
| 8.  | Our work                                                                                                                                                                             | 1585                                   | 2696                                    | 51                                  |

**Table 2 Raman Spectroscopy Reference Data for 1, 2, 3 layer graphene compared to our work**

| No of graphene layers | Position of 2D peak (cm <sup>-1</sup> ) | FWHM of 2D peak (cm <sup>-1</sup> ) |
|-----------------------|-----------------------------------------|-------------------------------------|
| 1                     | ~2700±5                                 | 20-30                               |
| 2                     | ~2710                                   | 30-55                               |
| 3                     | ~2715                                   | more than 60                        |
| Our work              | 2696                                    | 51                                  |

## References:

1. C. Ferrari, J. C. Meyer, V. Scardaci, C. Casiraghi, M. Lazzeri, F. Mauri, S. Piscanec, D. Jiang, K. S. Novoselov, S. Roth, and A. K. Geim *Phys. Rev. Lett.* 2006, **97**, 187401 .
2. J.S. Park, A. Reina, R. Saito, J. Kong, G. Dresselhaus, M.S. Dresselhaus *Carbon*, 2009, **47**, 1303.
3. D. Graf , F. Molitor , K. Ensslin , C. Stampfer , A. Jungen , C. Hierold , and L. Wirtz *Nano Lett.*, 2007, **7**, 238.
4. C. Casiraghi, S. Pisana, K. S. Novoselov, A. K. Geim, and A. C. Ferrari *Appl. Phys. Lett.*, 2007, **91**, 233108.
5. I. Calizo , A. A. Balandin , W. Bao , F. Miao , and C. N. Lau *Nano Lett.*, 2007, **7**, 2645.
6. Dehui Deng, Xiulian Pan<sup>\*</sup>, Hui Zhang, Qiang Fu, Dali Tan, Xinhe Bao *Adv. Mater.* 2010, **22**, 2168.
7. A. C. Ferrari *Solid State Commun.*, 2007, **143**, 47.

## Supporting Information (SI-II)

The possible mechanism for formation of graphene is described below. Upon pyrolysis of the polymer, first a carbon sheet with sodium carbonate is formed. This can be considered as a bottom-up process wherein the 1D polymer chain is converted to 2D carbon sheet (figure 1).

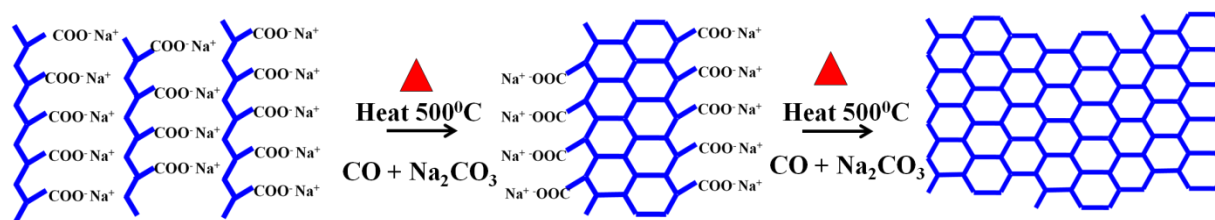

**Figure 1. Possible mechanism for formation of graphene sheet by pyrolysis of the specific polymer**

When the poly(acrylic acid) sodium salt is heated, adjacent polymer chains undergo a condensation reaction with loss of sodium carbonate and  $\text{CO}$  leading to the formation of 2D stable six-member ring structure. Due to the high temperature treatment, the carbon six member ring structures undergo aromatization which leads to the formation of an extended graphitic network. The overall structure thus formed is a graphene sheet possibly with some defects. The by-products of pyrolysis process are  $\text{CO}$  and  $\text{Na}_2\text{CO}_3$ . The sodium carbonate formed during pyrolysis hinders the stacking of graphene sheets as it intercalates between different sheets. Once the pyrolysed product is washed with D.I. water, the sodium carbonate is dissolved and completely removed, leaving dispersed ultrathin (1 or 2 layered) graphene sheets.
